# Supplementary material
Source: PubMed Central journal article supplement (PMC3396145)
Supplement: Supp_Data.pdf [file Supp_Data.pdf]

## Supplementary Data

SUPPLEMENTARY TABLE S1. ATTRIBUTES USED IN MODEL BUILDING

| <i>Attribute names</i>                   | <i>Type</i>                             |
|------------------------------------------|-----------------------------------------|
| <b>Demographics</b>                      |                                         |
| Age                                      | Continuous                              |
| Age <65, Age ≥65                         | Categorical (2 categories: 1=Yes, 0=No) |
| Gender                                   | Categorical (2 categories: 1=Yes, 0=No) |
| Body weight                              | Continuous                              |
| Body height                              | Continuous                              |
| BMI                                      | Continuous                              |
| BMI <18.5, BMI 18.5 to 24.9, BMI >24.9   | Categorical (2 categories: 1=Yes, 0=No) |
| <b>Clinical</b>                          |                                         |
| ECOG Status                              | Continuous                              |
| ECOG Status 0-1                          | Categorical (2 categories: 1=Yes, 0=No) |
| ECOG Status 2-4                          | Categorical (2 categories: 1=Yes, 0=No) |
| Primary Tumor Sites                      |                                         |
| Breast                                   | Categorical (2 categories: 1=Yes, 0=No) |
| Colorectal                               | Categorical (2 categories: 1=Yes, 0=No) |
| Nasopharynx                              | Categorical (2 categories: 1=Yes, 0=No) |
| Lung                                     | Categorical (2 categories: 1=Yes, 0=No) |
| Lymphoma                                 | Categorical (2 categories: 1=Yes, 0=No) |
| Urogenital                               | Categorical (2 categories: 1=Yes, 0=No) |
| Others                                   | Categorical (2 categories: 1=Yes, 0=No) |
| Number of metastatic sites               | Continuous                              |
| Number of metastatic sites 0-1           | Categorical (2 categories: 1=Yes, 0=No) |
| Number of metastatic sites ≥2            | Categorical (2 categories: 1=Yes, 0=No) |
| Metastatic sites                         |                                         |
| Bones                                    | Categorical (2 categories: 1=Yes, 0=No) |
| Brain                                    | Categorical (2 categories: 1=Yes, 0=No) |
| Liver                                    | Categorical (2 categories: 1=Yes, 0=No) |
| Lung                                     | Categorical (2 categories: 1=Yes, 0=No) |
| Lymph node                               | Categorical (2 categories: 1=Yes, 0=No) |
| Others                                   | Categorical (2 categories: 1=Yes, 0=No) |
| Years since diagnosed                    | Continuous                              |
| Years since diagnosed <6 years           | Categorical (2 categories: 1=Yes, 0=No) |
| Years since diagnosed ≥6 years           | Categorical (2 categories: 1=Yes, 0=No) |
| Chronic co morbidities                   |                                         |
| Diabetes mellitus                        | Categorical (2 categories: 1=Yes, 0=No) |
| Dyslipidemia                             | Categorical (2 categories: 1=Yes, 0=No) |
| Hypertension                             | Categorical (2 categories: 1=Yes, 0=No) |
| Others                                   | Categorical (2 categories: 1=Yes, 0=No) |
| Number of lines of previous chemotherapy | Continuous                              |
| Lines of previous chemotherapy 0-1       | Categorical (2 categories: 1=Yes, 0=No) |
| Lines of previous chemotherapy ≥2        | Categorical (2 categories: 1=Yes, 0=No) |
| Prior surgery                            | Categorical (2 categories: 1=Yes, 0=No) |
| Prior radiotherapy                       | Categorical (2 categories: 1=Yes, 0=No) |
| <b>Laboratory parameters</b>             |                                         |
| Creatinine (μmol/L)                      | Continuous                              |
| Low creatinine <sup>a</sup>              | Categorical (2 categories: 1=Yes, 0=No) |
| AST                                      | Continuous                              |
| AST >ULN                                 | Categorical (2 categories: 1=Yes, 0=No) |
| ALT                                      | Continuous                              |
| ALT >ULN                                 | Categorical (2 categories: 1=Yes, 0=No) |
| ALP                                      | Continuous                              |
| ALP >ULN                                 | Categorical (2 categories: 1=Yes, 0=No) |
| Bilirubin (μmol/L)                       | Continuous                              |
| Bilirubin >24 μmol/L                     | Categorical (2 categories: 1=Yes, 0=No) |
| Albumin (g/L)                            | Continuous                              |
| Albumin <35 g/L                          | Categorical (2 categories: 1=Yes, 0=No) |

*(continued)*

SUPPLEMENTARY TABLE S1. (CONTINUED)

| <i>Attribute names</i>                           | <i>Type</i>                                 |
|--------------------------------------------------|---------------------------------------------|
| Hgb (g/dL)                                       | Continuous                                  |
| Low Hgb <sup>b</sup>                             | Categorical (2 categories: 1 = Yes, 0 = No) |
| RBC (L)                                          | Continuous                                  |
| Low RBC <sup>c</sup>                             | Categorical (2 categories: 1 = Yes, 0 = No) |
| WBC (L)                                          | Continuous                                  |
| WBC <4.1×10 <sup>9</sup> L                       | Categorical (2 categories: 1 = Yes, 0 = No) |
| WBC >10×10 <sup>9</sup> L                        | Categorical (2 categories: 1 = Yes, 0 = No) |
| Platelets (L)                                    | Continuous                                  |
| Platelets <140×10 <sup>9</sup> L                 | Categorical (2 categories: 1 = Yes, 0 = No) |
| Platelets >440×10 <sup>9</sup> L                 | Categorical (2 categories: 1 = Yes, 0 = No) |
| Absolute monocyte count (L)                      | Continuous                                  |
| Absolute monocyte count <0.2×10 <sup>9</sup> L   | Categorical (2 categories: 1 = Yes, 0 = No) |
| Absolute monocyte count >0.8×10 <sup>9</sup> L   | Categorical (2 categories: 1 = Yes, 0 = No) |
| Absolute lymphocyte count (L)                    | Continuous                                  |
| Absolute lymphocyte count <1×10 <sup>9</sup> L   | Categorical (2 categories: 1 = Yes, 0 = No) |
| Absolute lymphocyte count >3×10 <sup>9</sup> L   | Categorical (2 categories: 1 = Yes, 0 = No) |
| Absolute neutrophil count (L)                    | Continuous                                  |
| Absolute neutrophil count <2×10 <sup>9</sup> L   | Categorical (2 categories: 1 = Yes, 0 = No) |
| Absolute neutrophil count >7.5×10 <sup>9</sup> L | Categorical (2 categories: 1 = Yes, 0 = No) |

<sup>a</sup>Low creatinine: <125 μmol/L for males, <90 μmol/L for females.

<sup>b</sup>Low Hgb: <14 g/dL for males, <12 g/dL for females.

<sup>c</sup>Low RBC: <4.3×10<sup>12</sup> L for males, <3.5×10<sup>12</sup> L for females.

ALT, alanine aminotransferase; AST, aspartate aminotransferase; BMI, body mass index; RCB, red blood cell count; ULN, upper limit of the normal range; WBC, white blood cell count.

SUPPLEMENTARY TABLE S2. PATIENT DEMOGRAPHICS

| <i>Attributes</i> | <i>Category</i>    | <i>Training Set (N=225)</i> |               | <i>Validation Set (N=100)</i> |               |
|-------------------|--------------------|-----------------------------|---------------|-------------------------------|---------------|
| Age (years)       | Mean [range]       | 62.06                       | [22–89]       | 57.93                         | [20–84]       |
|                   | Standard deviation | 12.320                      |               | 12.517                        |               |
|                   | Age <65            | 116                         | (51.6%)       | 73                            | (73%)         |
| Race              | Age ≥65            | 109                         | (48.4%)       | 27                            | (27%)         |
|                   | Chinese            | 200                         | (88.9%)       | 85                            | (85%)         |
|                   | Malay              | 17                          | (7.6%)        | 10                            | (10%)         |
|                   | Indian             | 4                           | (1.8%)        | 4                             | (4%)          |
|                   | Others             | 4                           | (1.8%)        | 1                             | (1%)          |
| Gender            | Male               | 125                         | (55.6%)       | 52                            | (52%)         |
|                   | Female             | 100                         | (44.4%)       | 48                            | (48%)         |
| Body weight (kg)  | Mean [range]       | 54.65                       | [30.1–98.6]   | 55.03                         | [32.3–82.8]   |
|                   | Standard deviation | 10.752                      |               | 11.243                        |               |
| Body height (cm)  | Mean [range]       | 160.23                      | [140–184]     | 159.89                        | [140–178]     |
|                   | Standard deviation | 8.028                       |               | 8.239                         |               |
| BMI               | Mean [range]       | 21.29                       | [13.09–36.00] | 21.46                         | [13.93–31.25] |
|                   | Standard deviation | 3.988                       | (23.1%)       | 3.816                         |               |
|                   | BMI <18.5          | 52                          | (60%)         | 24                            | (24%)         |
|                   | BMI 18.5 to 24.9   | 135                         | (16.9%)       | 59                            | (59%)         |
|                   | BMI >24.9          | 38                          |               | 17                            | (17%)         |

BMI, body mass index; ECOG, Eastern Cooperative Oncology Group.

SUPPLEMENTARY TABLE S3. PATIENT CLINICAL INFORMATION

| <i>Attributes</i>              | <i>Category</i>   | <i>Training set</i><br>(N = 225) |         | <i>Validation set</i> (N = 100) |         |
|--------------------------------|-------------------|----------------------------------|---------|---------------------------------|---------|
| ECOG status                    | 0-1               | 169                              | (75.1%) | 65                              | (65%)   |
|                                | 2-4               | 56                               | (24.9%) | 35                              | (35%)   |
| Survive beyond 120 days?       | Yes               | 115                              | (51.1%) | 50                              | (50%)   |
|                                | No                | 110                              | (48.9%) | 50                              | (50%)   |
| Primary tumor sites            | Breast            | 37                               | (16.4%) | 16                              | (16%)   |
|                                | Colorectal        | 39                               | (17.3%) | 14                              | (14%)   |
|                                | Nasopharynx       | 17                               | (7.6%)  | 9                               | (9%)    |
|                                | Lung              | 56                               | (24.9%) | 29                              | (29%)   |
|                                | Lymphoma          | 10                               | (4.4%)  | 4                               | (4%)    |
|                                | Urogenital        | 14                               | (6.2%)  | 6                               | (6%)    |
|                                | Other             | 52                               | (23.1%) | 22                              | (22%)   |
| Number of metastatic sites     | 0-1               | 133                              | (59.1%) | 50                              | (50%)   |
|                                | ≥ 2               | 92                               | (40.9%) | 50                              | (50%)   |
| Metastatic sites               | Bones             | 55                               | (16.2%) | 30                              | (17.6%) |
|                                | Brain             | 32                               | (9.4%)  | 12                              | (7.1%)  |
|                                | Liver             | 77                               | (22.6%) | 43                              | (25.3%) |
|                                | Lung              | 79                               | (23.2%) | 40                              | (23.5%) |
|                                | Lymph node        | 30                               | (8.8%)  | 17                              | (10%)   |
|                                | Others            | 67                               | (19.7%) | 28                              | (16.5%) |
| Years since diagnosed          | < 6               | 212                              | (94.2%) | 92                              | (92%)   |
|                                | ≥ 6               | 13                               | (5.8%)  | 8                               | (8%)    |
| Chronic co-morbidities         | Diabetes mellitus | 16                               | (7.1%)  | 17                              | (19.8%) |
|                                | Dyslipidemia      | 60                               | (26.5%) | 21                              | (24.4%) |
|                                | Hypertension      | 99                               | (43.8%) | 32                              | (37.2%) |
|                                | Other             | 51                               | (22.6%) | 16                              | (18.6%) |
| Prior surgery                  | Yes               | 80                               | (35.6%) | 29                              | (29%)   |
|                                | No                | 145                              | (64.4%) | 71                              | (71%)   |
| Prior radiotherapy             | Yes               | 103                              | (45.8%) | 46                              | (46%)   |
|                                | No                | 122                              | (54.2%) | 54                              | (54%)   |
| Lines of previous chemotherapy | 0-1               | 186                              | (82.7%) | 78                              | (78%)   |
|                                | ≥ 2               | 39                               | (17.4%) | 22                              | 22%     |

ECOG, Eastern Cooperative Oncology Group.

SUPPLEMENTARY TABLE S4. PATIENT LABORATORY PARAMETERS

| <i>Attributes</i>                              | <i>Category</i>    | <i>Training set (N=225)</i> |               | <i>Validation set (N=100)</i> |                |
|------------------------------------------------|--------------------|-----------------------------|---------------|-------------------------------|----------------|
| Creatinine ( $\mu\text{mol/L}$ )               | Mean [range]       | 60.97                       | [7–99]        | 76.49                         | [37–342]       |
|                                                | Standard deviation | 22.837                      |               | 47.896                        |                |
| Low creatinine                                 | Yes                | 18                          | (8%)          | 9                             | (9%)           |
|                                                | No                 | 207                         | (92%)         | 91                            | (91%)          |
| AST                                            | Mean [range]       | 39.00                       | [12–213]      | 43.05                         | [1.9–409.0]    |
|                                                | Standard deviation | 36.574                      |               | 52.938                        |                |
| AST >ULN                                       | Yes                | 76                          | (33.8%)       | 32                            | (32%)          |
|                                                | No                 | 149                         | (66.2%)       | 68                            | (68%)          |
| ALT                                            | Mean [range]       | 28.04                       | [6–201]       | 32.24                         | [7–142]        |
|                                                | Standard deviation | 23.814                      |               | 26.475                        |                |
| ALT >ULN                                       | Yes                | 36                          | (16%)         | 28                            | (28%)          |
|                                                | No                 | 189                         | (84%)         | 72                            | (72%)          |
| ALP                                            | Mean [range]       | 137.99                      | [15–1636]     | 151.54                        | [24–1140]      |
|                                                | Standard deviation | 167.82                      |               | 189.92                        |                |
| ALP >ULN                                       | Yes                | 60                          | (26.7%)       | 24                            | (24%)          |
|                                                | No                 | 165                         | (73.3%)       | 76                            | (76%)          |
| Bilirubin ( $\mu\text{mol/L}$ )                | Mean [range]       | 20.99                       | [2–697]       | 18.12                         | [5–178]        |
|                                                | Standard deviation | 55.484                      |               | 19.044                        |                |
| Bilirubin >24 $\mu\text{mol/L}$                | Yes                | 27                          | (12%)         | 13                            | (13%)          |
|                                                | No                 | 198                         | (88%)         | 87                            | (87%)          |
| Albumin (g/L)                                  | Mean [range]       | 32.24                       | [15–44]       | 33.09                         | [22–61]        |
|                                                | Standard deviation | 5.703                       |               | 5.822                         |                |
| Albumin <35 g/L                                | Yes                | 138                         | (61.3%)       | 56                            | (56%)          |
|                                                | No                 | 87                          | (38.7%)       | 44                            | (44%)          |
| Hgb (g/dL)                                     | Mean [range]       | 11.08                       | [6.8–16.7]    | 11.11                         | [7.8–17.4]     |
|                                                | Standard deviation | 1.799                       |               | 1.782                         |                |
| Low Hgb                                        | Yes                | 189                         | (84%)         | 87                            | (87%)          |
|                                                | No                 | 36                          | (16%)         | 13                            | (13%)          |
| RBC (L)                                        | Mean [range]       | 3.74                        | [2.06–37.0]   | 3.58                          | [2.08–5.59]    |
|                                                | Standard deviation | 2.333                       |               | 0.661                         |                |
| Low RBC                                        | Yes                | 153                         | (68%)         | 65                            | (65%)          |
|                                                | No                 | 72                          | (32%)         | 35                            | (35%)          |
| WBC (L)                                        | Mean [range]       | 6.39                        | [1.2–25.4]    | 6.87                          | [2.4–22]       |
|                                                | Standard deviation | 3.929                       |               | 4.039                         |                |
| WBC <4.1 $\times 10^9$ L                       | Yes                | 59                          | (26.2%)       | 27                            | (27%)          |
|                                                | No                 | 166                         | (73.8%)       | 73                            | (73%)          |
| WBC >10 $\times 10^9$ L                        | Yes                | 28                          | (12.4%)       | 19                            | (19%)          |
|                                                | No                 | 197                         | (87.6%)       | 81                            | (81%)          |
| Platelets (L)                                  | Mean [range]       | 267.61                      | [1.91–886.00] | 272.78                        | [62.00–865.00] |
|                                                | Standard deviation | 129.55                      |               | 158.34                        |                |
| Platelets <140 $\times 10^9$ L                 | Yes                | 38                          | (16.9%)       | 17                            | (17%)          |
|                                                | No                 | 187                         | (83.1%)       | 83                            | (83%)          |
| Platelets >440 $\times 10^9$ L                 | Yes                | 19                          | (8.4%)        | 11                            | (11%)          |
|                                                | No                 | 206                         | (91.6%)       | 89                            | (89%)          |
| Absolute monocyte count (L)                    | Mean [range]       | 0.66                        | [0.02–9.20]   | 0.61                          | [0.01–2.29]    |
|                                                | Standard deviation | 0.792                       |               | 0.395                         |                |
| Absolute monocyte count <0.2 $\times 10^9$ L   | Yes                | 21                          | (9.3%)        | 4                             | (4%)           |
|                                                | No                 | 204                         | (90.7%)       | 96                            | (96%)          |
| Absolute monocyte count >0.8 $\times 10^9$ L   | Yes                | 53                          | (23.6%)       | 21                            | (21%)          |
|                                                | No                 | 172                         | (76.4%)       | 79                            | (79%)          |
| Absolute lymphocyte count (L)                  | Mean [range]       | 1.14                        | [0.05–5.60]   | 1.30                          | [0.25–7.4]     |
|                                                | Standard deviation | 0.728                       |               | 0.910                         |                |
| Absolute lymphocyte count <1 $\times 10^9$ L   | Yes                | 106                         | (47.1%)       | 38                            | (38%)          |
|                                                | No                 | 119                         | (52.9%)       | 62                            | (62%)          |
| Absolute lymphocyte count >3 $\times 10^9$ L   | Yes                | 3                           | (1.3%)        | 5                             | (5%)           |
|                                                | No                 | 222                         | (98.7%)       | 95                            | (95%)          |
| Absolute neutrophil count (L)                  | Mean [range]       | 4.88                        | [0.72–87.30]  | 5.38                          | [0.59–58.70]   |
|                                                | Standard deviation | 6.532                       |               | 6.553                         |                |
| Absolute neutrophil count <2 $\times 10^9$ L   | Yes                | 36                          | (16%)         | 18                            | (18%)          |
|                                                | No                 | 189                         | (84%)         | 82                            | (82%)          |
| Absolute neutrophil count >7.5 $\times 10^9$ L | Yes                | 30                          | (13.3%)       | 17                            | (17%)          |
|                                                | No                 | 195                         | (86.7%)       | 83                            | (83%)          |

ALP, alkaline phosphatase; ALT, alanine transaminase; AST, aspartate aminotransferase; RCB, red blood cell count; ULN, upper limit of the normal range; WBC, white blood cell count.
